# Supplementary material for: A large-scale cancer-specific protein-DNA interaction network
Source: PubMed Central journal article supplement — bioRxiv. 2024 Jan 29:2024.01.24.577099. Preprint. [Version 1] doi: 10.1101/2024.01.24.577099 (PMC10862707; doi:10.1101/2024.01.24.577099), 2024-01-29
Supplement: media-1.pdf [file media-1.pdf]

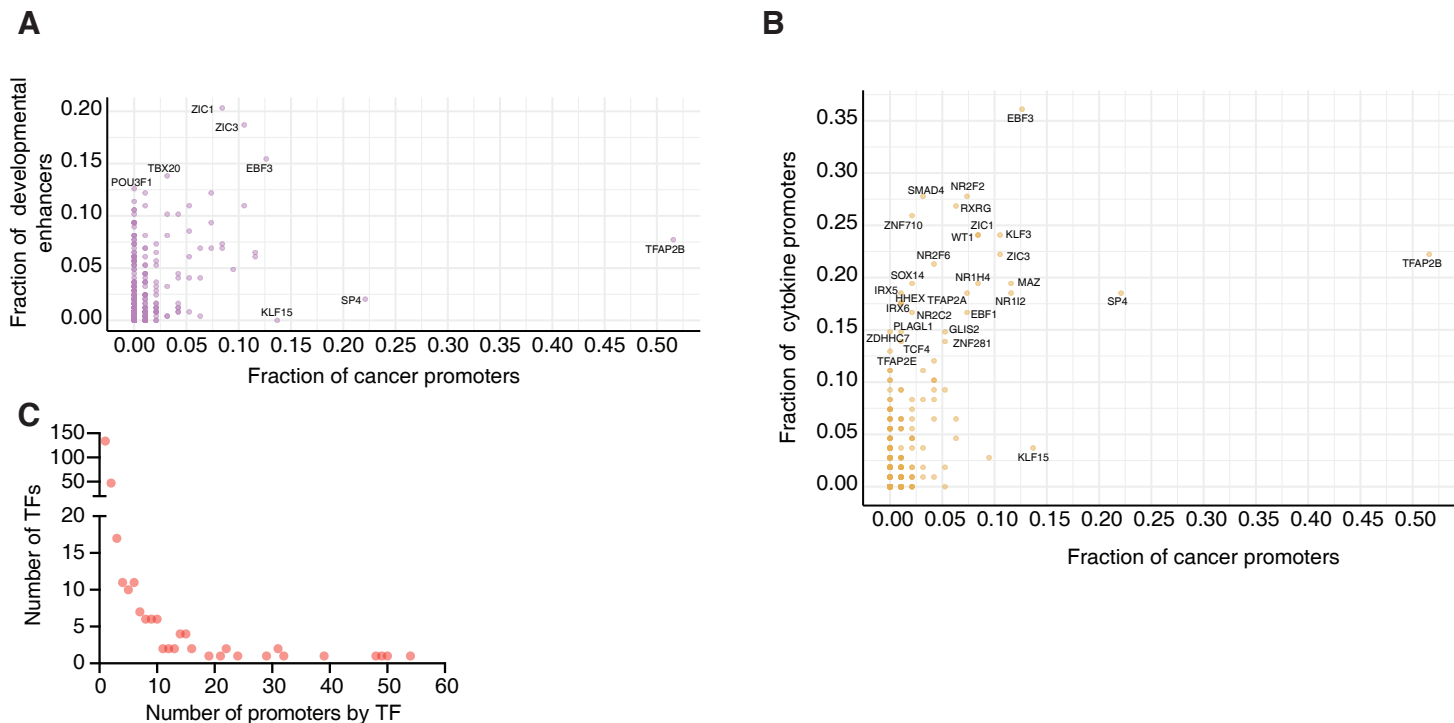

**Supplementary Figure 1: Comparison between the TF connectivity in different networks. (A-B)** Percentage of protein-DNA interactions for each TF in the cancer gene network versus the developmental enhancer (A) or the cytokine gene (B) networks. (C) Distribution of the number of TFs with the binding the indicated number of gene promoters.
